# Supplementary material for: Identification of an IGHV3-53-Encoded RBD-Targeting Cross-Neutralizing Antibody from an Early COVID-19 Convalescent
Source: MDPI journal article supplement (doi:10.3390/pathogens13040272), 2024-03-23
Supplement: s1 [file s1]

**Table S1.** The binding activity of 57 mAbs to Prototype and Omicron respectively (OD<sub>450</sub> value).

| MAbs | Prototype | Omicron |
|------|-----------|---------|
| A1   | 1.2210    | 0.0180  |
| A2   | 0.0045    | 0.0060  |
| A3   | 3.0105    | 0.0235  |
| A8   | 2.4265    | 0.0085  |
| A10  | 0.1065    | 0.0080  |
| A12  | 0.7420    | 0.0065  |
| B4   | 0.0065    | 0.0060  |
| B8   | 2.8225    | 0.0075  |
| B10  | 2.9920    | 0.5200  |
| B11  | 0.1980    | 0.0090  |
| B12  | 3.1335    | 0.0175  |
| C1   | 2.6550    | 0.0095  |
| C3   | 3.0165    | 1.1530  |
| C6   | 2.9040    | 0.5105  |
| C8   | 0.4090    | 0.2435  |
| C10  | 0.9925    | 0.0060  |
| C11  | 3.0730    | 0.2135  |
| C12  | 3.0330    | 0.5615  |
| D6   | 3.0890    | 2.4625  |
| D7   | 3.0585    | 0.0165  |
| D9   | 0.9755    | 0.0165  |
| E2   | 3.1790    | 0.0070  |
| E4   | 3.3065    | 0.0700  |
| E5   | 2.7205    | 0.1890  |
| E7   | 0.0050    | 0.0045  |
| E9   | 2.4015    | 0.0315  |
| E10  | 2.3810    | 0.0065  |
| E12  | 2.9965    | 0.0060  |
| F1   | 0.0135    | 0.0070  |
| F5   | 0.6975    | 0.6970  |
| F8   | 3.0090    | 0.6880  |
| F9   | 2.8630    | 0.0145  |
| F11  | 1.1195    | 0.0145  |
| G2   | 2.9730    | 0.9865  |
| G3   | 3.0910    | 2.2395  |
| G5   | 0.2855    | 0.0565  |
| G6   | 2.8550    | 0.0070  |
| G8   | 3.1020    | 0.0120  |
| G11  | 3.0410    | 0.0070  |
| G12  | 3.3185    | 2.1955  |
| H2   | 2.6520    | 0.0115  |
| H4   | 2.9215    | 0.6680  |
| H5   | 2.8980    | 0.0105  |
| H6   | 2.6255    | 0.0070  |
| H8   | 2.7840    | 0.0430  |
| H10  | 2.7650    | 0.0065  |
| H11  | 0.0390    | 0.0075  |
| H12  | 0.0245    | 0.0095  |
| A4-2 | 2.2115    | 0.0060  |
| A5-2 | 0.0055    | 0.0050  |
| A6-2 | 0.0935    | 0.0070  |
| A7-2 | 2.3835    | 0.1775  |

|                  |        |        |
|------------------|--------|--------|
| A12-2            | 2.1760 | 0.0650 |
| B7-2             | 2.7220 | 0.0165 |
| B8-2             | 2.4860 | 0.1450 |
| B9-2             | 2.9330 | 0.0150 |
| B11-2            | 2.7135 | 0.0100 |
| Negative control | 0.0075 | 0.0060 |

- ✧ MAb was expressed in 24-well plate in duplicate wells.
- ✧ The OD<sub>450</sub> value was the average value of two independent ELISA experiments.
- ✧ Nine mAbs in light orange background were tested neutralizing activity against pseudovirus of prototype stain.
